# Supplementary material for: Redox control in palladium catalyzed norbornene and alkyne polymerization
Source: Royal Society of Chemistry journal article supplement (doi:10.1039/c6qi00562d), 2017-01-01
Supplement: c6qi00562d1.pdf [file c6qi00562d1.pdf]

**Supporting Information for:**  
**Redox Control in Palladium Catalyzed Norbornene and Alkyne**  
**Polymerization**

Wenping Zou, Wenmin Pang, Changle Chen\*

*CAS Key Laboratory of Soft Matter Chemistry, iChEM (Collaborative Innovation Center of Chemistry for Energy Materials), Department of Polymer Science and Engineering, University of Science and Technology of China, Hefei, 230026, China*

\*To whom correspondence should be addressed. Telephone: +86-551-63601495. Email: changle@ustc.edu.cn

**Content**

|                                                                                                                            |  |
|----------------------------------------------------------------------------------------------------------------------------|--|
| <b>1. NMR, electrochemical characterizations of Pd complexes .....</b>                                                     |  |
| <b>2. NMR study of the interconversion between the neutral and oxidized complexes .....</b>                                |  |
| <b>3. Table of Polymerization and In-situ switching polymerization of Norbornene, NB-OAc and 1-chloro-1-octyne . .....</b> |  |
| <b>4. NMR monitoring experiments of NB-OAc and 1-chloro-1-octyne homopolymerization</b>                                    |  |
| <b>5. In-situ switching experiment of NB-OAc homopolymerization .....</b>                                                  |  |
| <b>6. In-situ switching experiment of 1-chloro-1-octyne homopolymerization .....</b>                                       |  |
| <b>7. <sup>1</sup>H and <sup>13</sup>C NMR spectra of the polymers .....</b>                                               |  |
| <b>8. IR spectra of Poly(1-chloro-1-octyne) .....</b>                                                                      |  |
| <b>9. X-Ray Crystallography.....</b>                                                                                       |  |

# 1. NMR, electrochemical characterizations of Pd-Me complex.

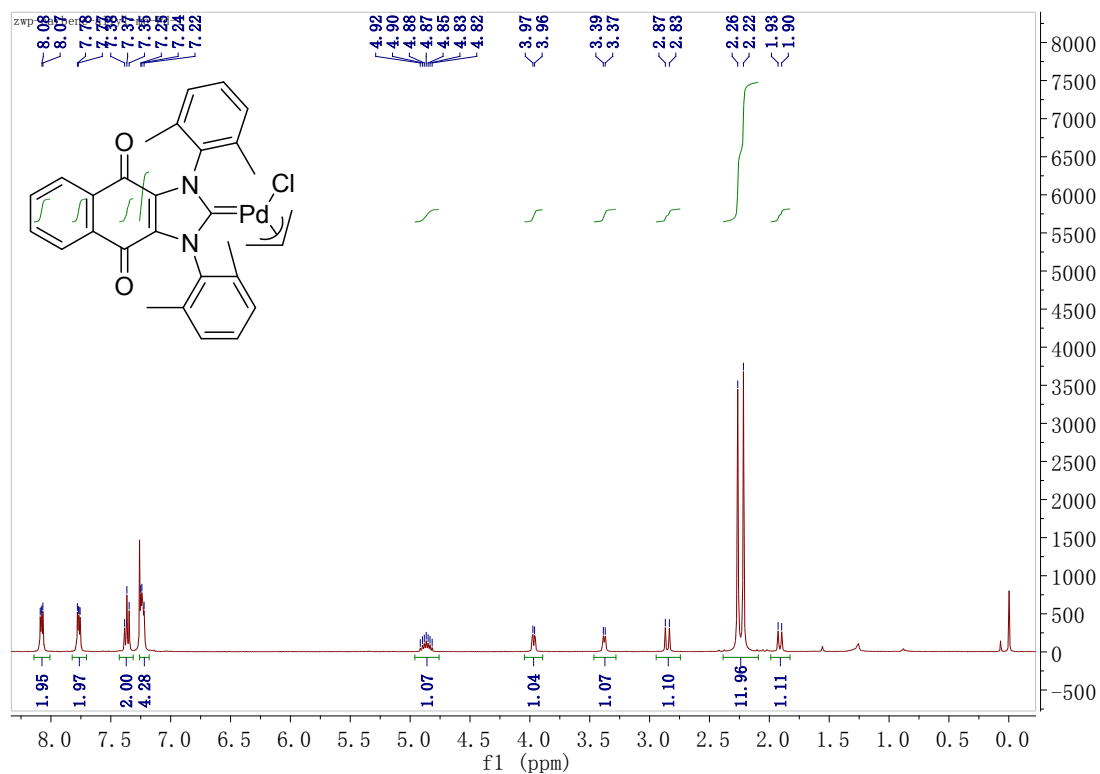

Figure S1.

**e S1.**  $^1\text{H}$  NMR spectrum of Pd-Me in  $\text{CDCl}_3$ .

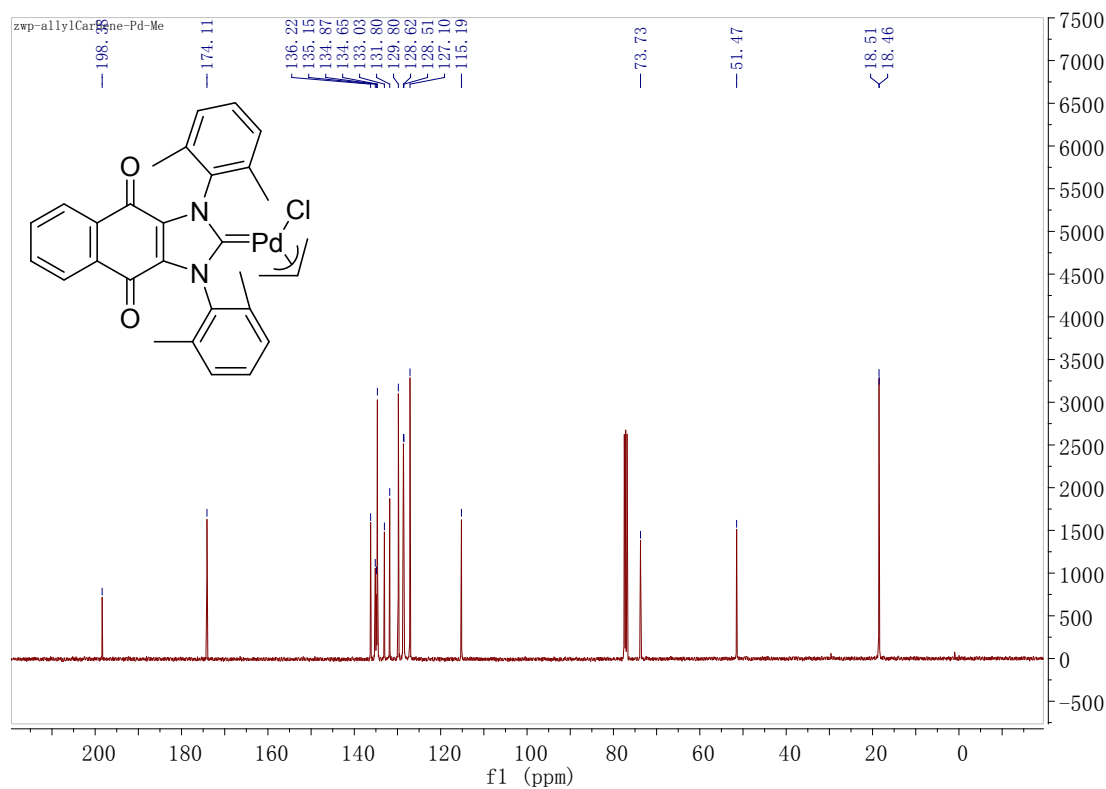

**Figure S2.**  $^{13}\text{C}$  NMR spectrum of Pd-Me in  $\text{CDCl}_3$ .

Electrochemistry Cyclic voltammetry measurements were performed on 0.01 mmol compound in 5 mL CH<sub>2</sub>Cl<sub>2</sub> solution (0.002 M) with supporting electrolyte 0.2 M [nBu<sub>4</sub>N]<sup>+</sup>[PF<sub>6</sub>]<sup>-</sup>, using Ag/AgCl as the reference electrode, along with platinum working and auxiliary electrodes, and a scan rate of 100 mV/s. The results of the electrochemical investigations are shown in Table S1. The E<sub>p1/2</sub> of CoCp<sub>2</sub> is -1.334V has been reported previously.<sup>1</sup>

| compound                 | E <sub>p</sub> <sup>A</sup> / V | E <sub>p</sub> <sup>C</sup> / V | E <sub>p1/2</sub> / V |
|--------------------------|---------------------------------|---------------------------------|-----------------------|
| <b>Pd-Me</b>             | -0.465                          | -0.732                          | -0.599                |
| <b>Pd-<sup>i</sup>Pr</b> | -0.530                          | -0.725                          | -0.628                |

**Table S1.** Electrochemical studies.

(1) Sun, H.; Xue, F.; Nelson, A. P.; Redepenning, J.; DiMugno, S. G. *Inorg. Chem.* **2003**, 42, 4507– 4509.

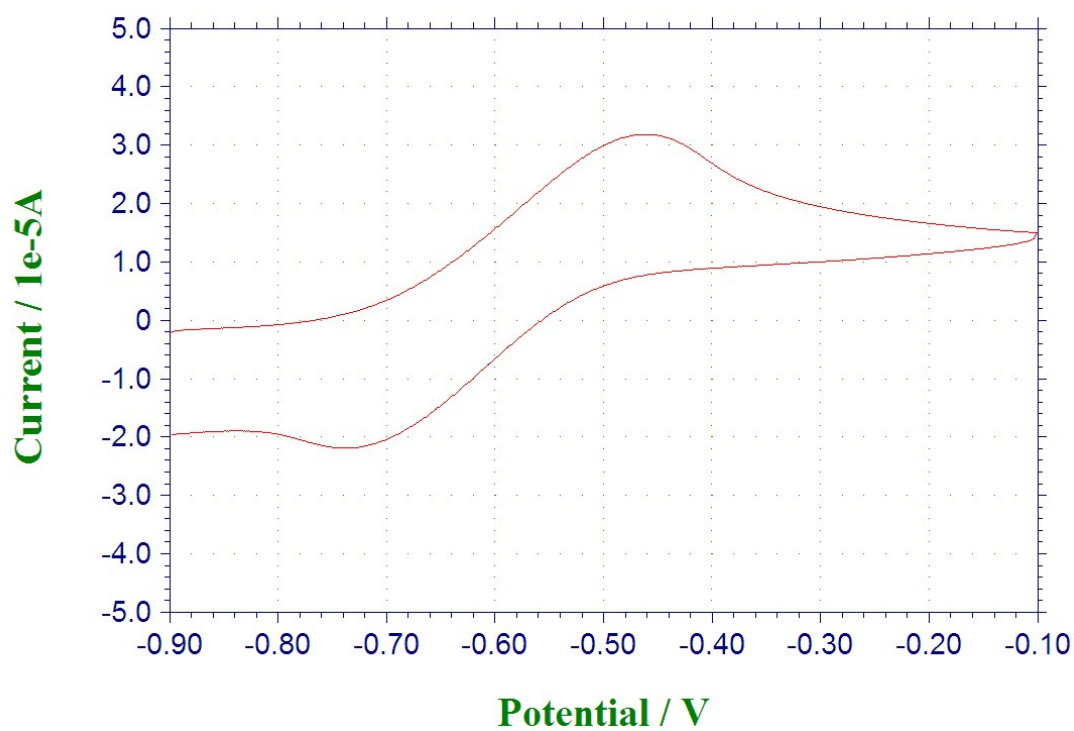

**Figure S3.** Cyclic Voltammogram of Pd-Me.

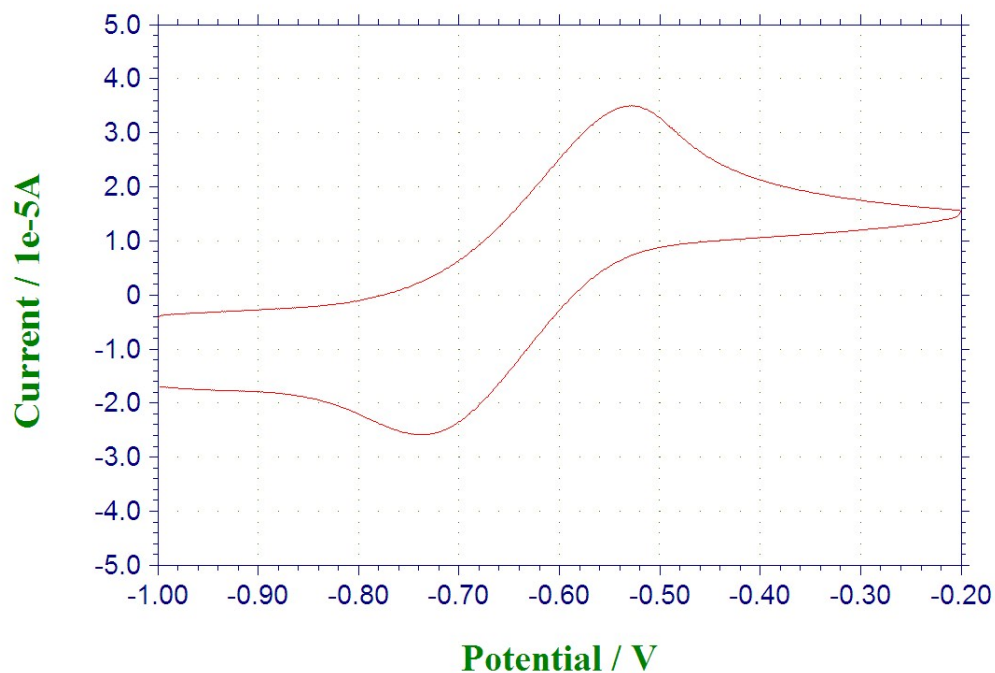

Figure S4. Cyclic Voltammogram of Pd-iPr.

## 2. NMR study of the interconversion between the neutral and oxidized complexes.

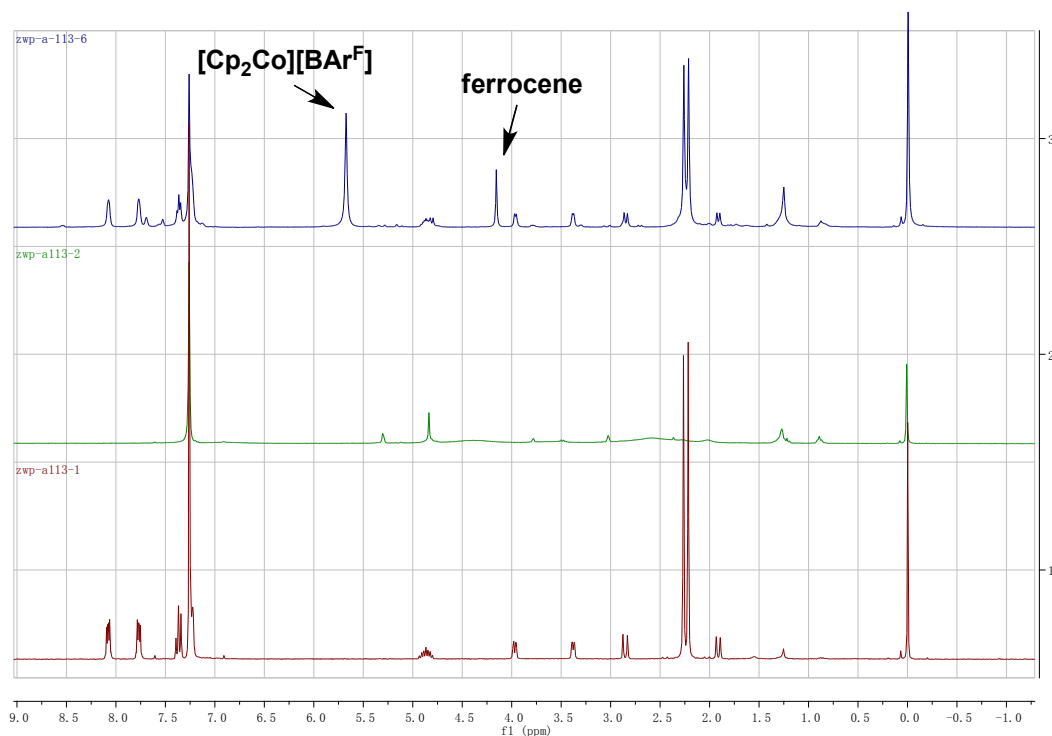

Figure S5.  $^1\text{H}$  NMR stack ( $\text{CDCl}_3$ ) showing (a) complex Pd-Me; (b) complex Pd-Me + 1 equiv  $\text{CoCp}_2$  (i.e. in situ formation of Pd-Me<sup>red</sup>); (c) mixture from spectrum (b) + 1 equiv  $\text{FcBAR}^{\text{F}}$ , showing the reformation of the resonances for complex Pd-Me.

**3. Table of Polymerization and In-situ switching polymerization of Norbornene, NB-OAc and 1-chloro-1-octyne.<sup>a</sup>**

| entry | Pd complex                              | Monomer         | additive <sup>b</sup> | Time (min) | Yield <sup>c</sup> (%) | TOF <sup>d</sup> | Mn   | PDI  |
|-------|-----------------------------------------|-----------------|-----------------------|------------|------------------------|------------------|------|------|
| 1     | <b>Pd-Me</b>                            | NB              | NaBAR <sub>4</sub>    | 2min       | 96                     | 2880             | -    | -    |
| 2     | <b>Pd-Me</b>                            | NB              | NaBAR <sub>4</sub>    | 5min       | 95                     | 1140             | -    | -    |
| 3     | <b>Pd-Me</b>                            | NB              | none                  | 2h         | 0                      | -                | -    | -    |
| 4     | <b>[Pd-Me]<sup>-</sup></b>              | NB              | NaBAR <sub>4</sub>    | 2h         | 0                      | -                | -    | -    |
| 5     | <b>[Pd-Me]<sup>-</sup></b>              | NB              | none                  | 2h         | 0                      | -                | -    | -    |
| 6     | <b>[Pd-Me]<sup>-e</sup></b>             | NB              | NaBAR <sub>4</sub>    | 2min       | 95                     | 2850             | -    | -    |
| 7     | <b>[Pd-Me]<sup>-e</sup></b>             | NB              | none                  | 2h         | 0                      | -                | -    | -    |
| 8     | <b>Pd-<sup>i</sup>Pr</b>                | NB              | NaBAR <sub>4</sub>    | 2min       | 80                     | 2400             | -    | -    |
| 9     | <b>Pd-<sup>i</sup>Pr</b>                | NB              | NaBAR <sub>4</sub>    | 5min       | 96                     | 1152             | -    | -    |
| 10    | <b>Pd-<sup>i</sup>Pr</b>                | NB              | none                  | 2h         | 0                      | -                | -    | -    |
| 11    | <b>[Pd-<sup>i</sup>Pr]<sup>-</sup></b>  | NB              | NaBAR <sub>4</sub>    | 2h         | 0                      | -                | -    | -    |
| 12    | <b>[Pd-<sup>i</sup>Pr]<sup>-</sup></b>  | NB              | none                  | 2h         | 0                      | -                | -    | -    |
| 13    | <b>[Pd-<sup>i</sup>Pr]<sup>-e</sup></b> | NB              | NaBAR <sub>4</sub>    | 2min       | 83                     | 2490             | -    | -    |
| 14    | <b>[Pd-<sup>i</sup>Pr]<sup>-e</sup></b> | NB              | NaBAR <sub>4</sub>    | 5min       | 94                     | 1128             | -    | -    |
| 15    | <b>[Pd-<sup>i</sup>Pr]<sup>-e</sup></b> | NB              | none                  | 2h         | 0                      | -                | -    | -    |
| 16    | <b>Pd-Me</b>                            | NB-OAc          | NaBAR <sub>4</sub>    | 1h         | 33                     | 33               | 3870 | 1.29 |
| 17    | <b>Pd-Me</b>                            | NB-OAc          | NaBAR <sub>4</sub>    | 4h         | 65                     | 16               | 4010 | 1.31 |
| 18    | <b>Pd-Me</b>                            | NB-OAc          | NaBAR <sub>4</sub>    | 9h         | 87                     | 10               | 4221 | 1.30 |
| 19    | <b>Pd-<sup>i</sup>Pr</b>                | NB-OAc          | NaBAR <sub>4</sub>    | 9h         | 22                     | 2                | 3030 | 1.28 |
| 20    | <b>Pd-Me</b>                            | 1-chloro-octyne | NaBAR <sub>4</sub>    | 1.5h       | 46                     | 31               | 3950 | 1.25 |
| 21    | <b>Pd-<sup>i</sup>Pr</b>                | 1-chloro-octyne | NaBAR <sub>4</sub>    | 0.5h       | 37                     | 74               | 6530 | 1.26 |
| 22    | <b>Pd-<sup>i</sup>Pr</b>                | 1-chloro-octyne | NaBAR <sub>4</sub>    | 1h         | 52                     | 52               | 6680 | 1.35 |
| 23    | <b>Pd-<sup>i</sup>Pr</b>                | 1-chloro-octyne | NaBAR <sub>4</sub>    | 1.5h       | 65                     | 43               | 6820 | 1.23 |
| 24    | <b>[Pd-<sup>i</sup>Pr]<sup>-</sup></b>  | 1-chloro-octyne | NaBAR <sub>4</sub>    | 1.5h       | trace                  | -                | -    | -    |

<sup>a</sup>Conditions: 10 μmol cat., 1.0 mmol monomer, NB and NB-OAc in 2 ml CHCl<sub>3</sub> at 25 °C, 1-chloro-1-octyne in 2 ml toluene at 60 °C, The molecular weight of polynorbornene was not determined due to the low solubility of the polymer product even in trichloro-benzene at 120

<sup>o</sup>C. <sup>b</sup>Pd/NaBAF = 1. <sup>c</sup>Precipitate from 10 ml methanol. <sup>d</sup>Calculated as (mol monomer in polymer) mol Pd<sup>-1</sup>h<sup>-1</sup>. <sup>e</sup>1 equiv. of FcBAr<sup>F</sup> was added.

#### 4. NMR monitoring experiments of NB-OAc and 1-chloro-1-octyne homopolymerization.

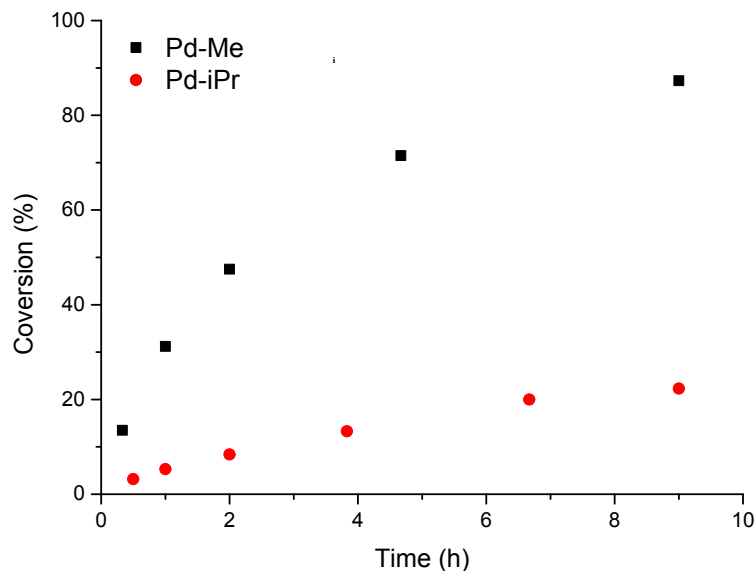

Figure S6. Polymerization of 100 equivalents of NB-OAc in CDCl<sub>3</sub> at 25 °C starting from Pd-Me and Pd-iPr.

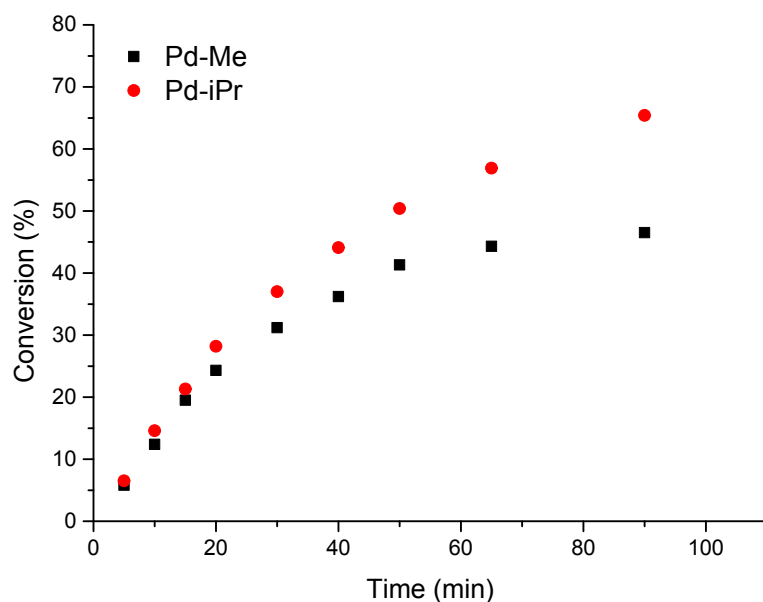

Figure S7. Polymerization of 100 equivalents of 1-chloro-1-octyne in d<sup>8</sup>-toluene at 60 °C starting from Pd-Me and Pd-iPr.

#### 5. In-situ switching experiment of NB-OAc homopolymerization.

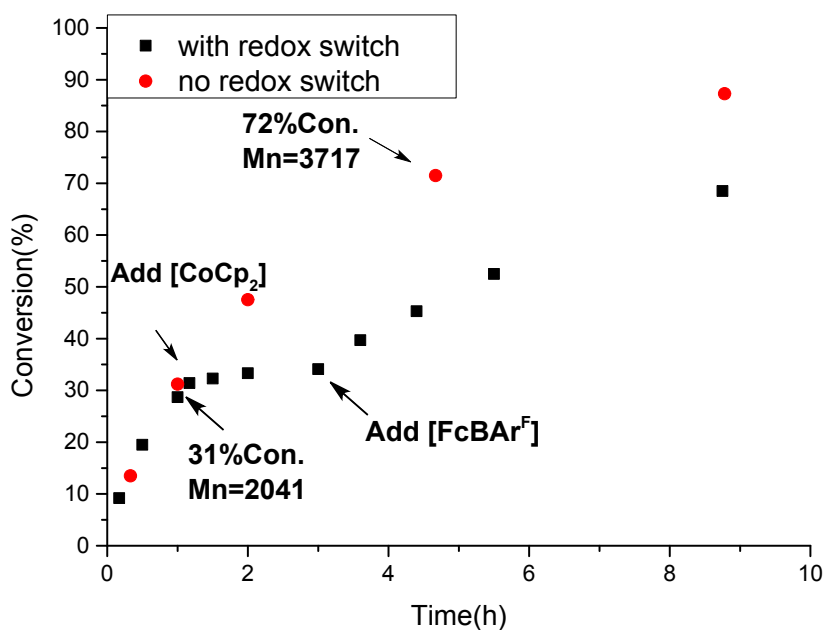

**Figure S8.** Polymerization of 50 equivalents of NB-OAc in  $\text{CDCl}_3$  at 25 °C starting from Pd-Me.

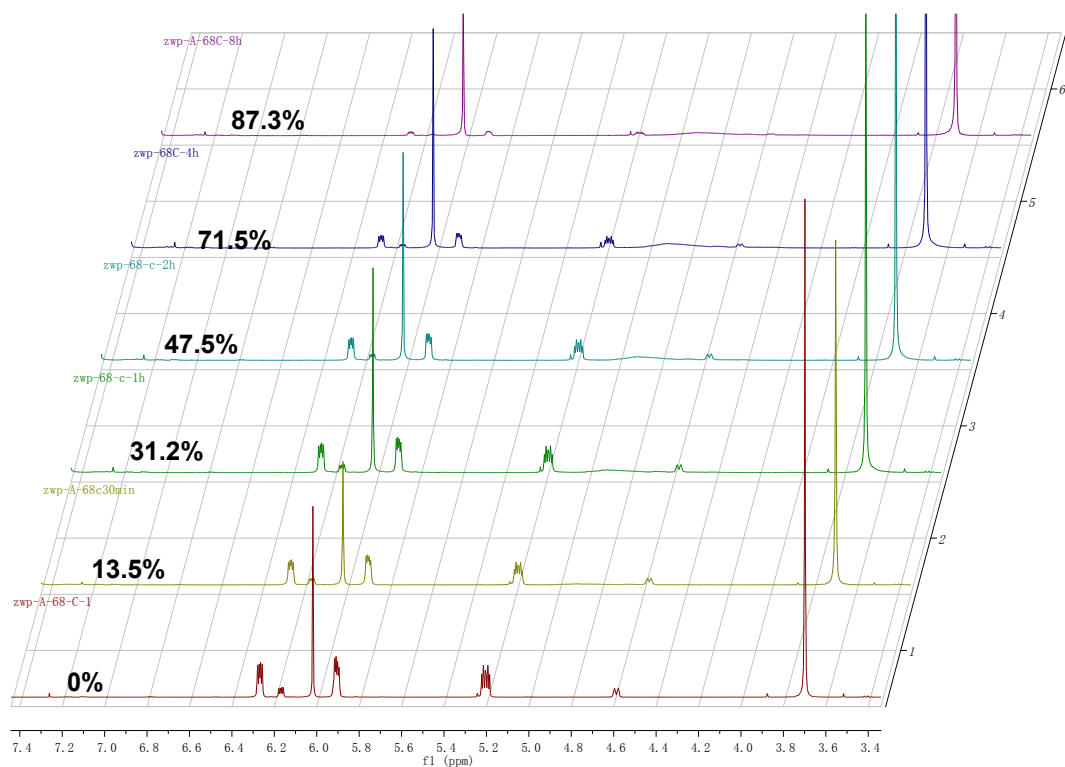

**Figure S9.** NMR monitoring experiments of NB-OAc homopolymerization using Pd-Me.

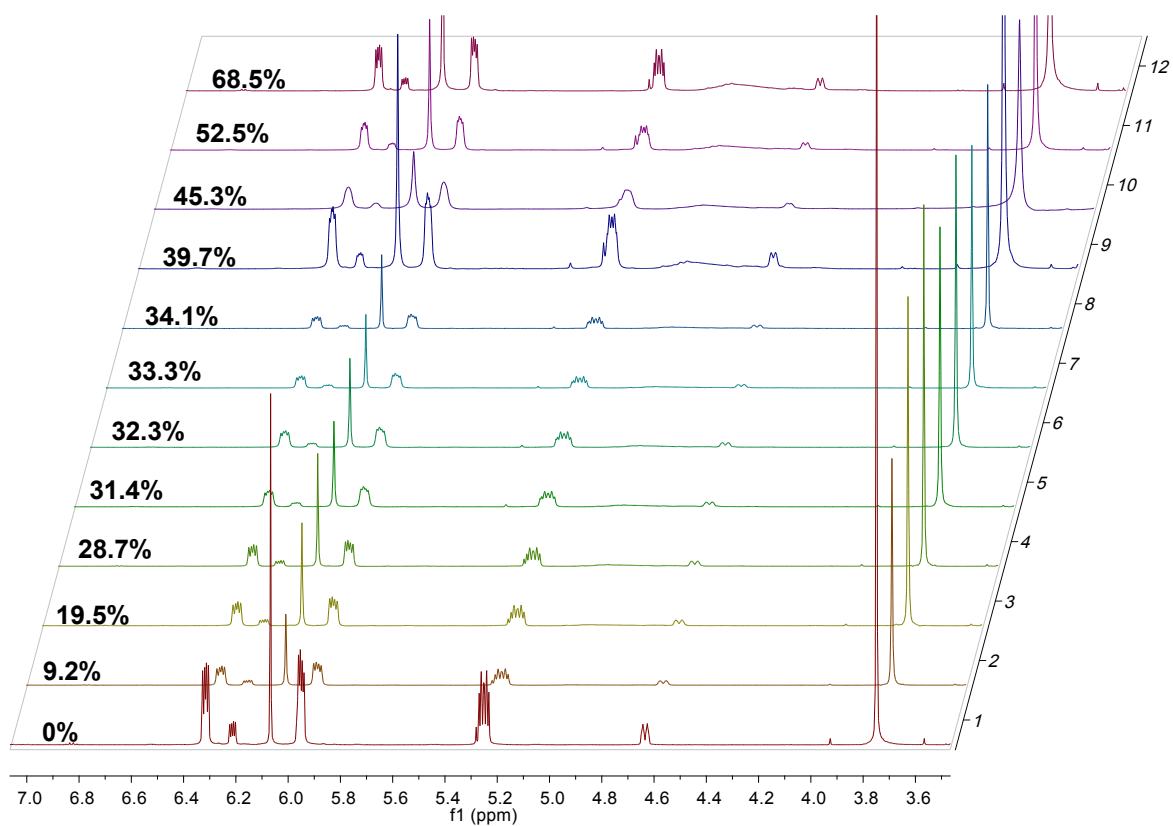

**Figure S10.** In-situ switching experiment of NB-OAc homopolymerization using Pd-Me.

### 6. In-situ switching experiment of 1-chloro-1-octyne homopolymerization.

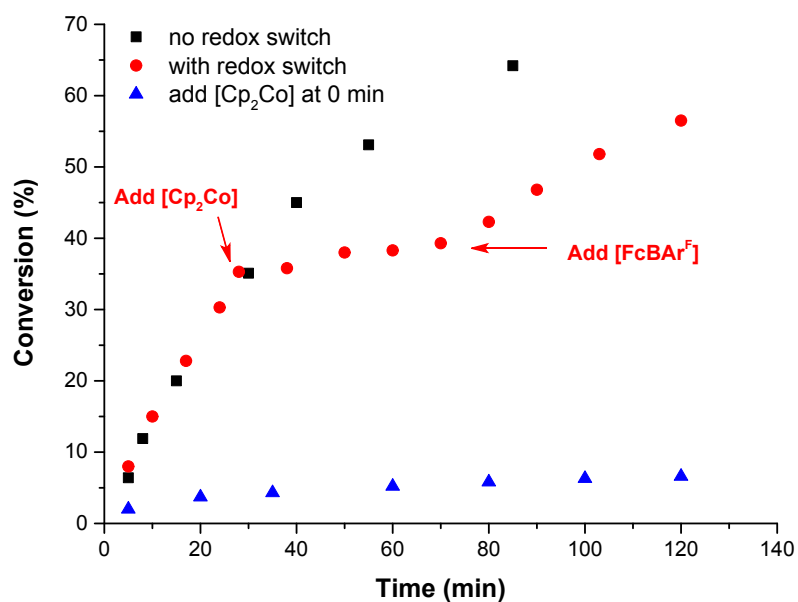

**Figure S11.** Polymerization of 50 equivalents of 1-chloro-1-octyne in d<sup>8</sup>-toluene at 60 °C starting from Pd<sup>i</sup>Pr.



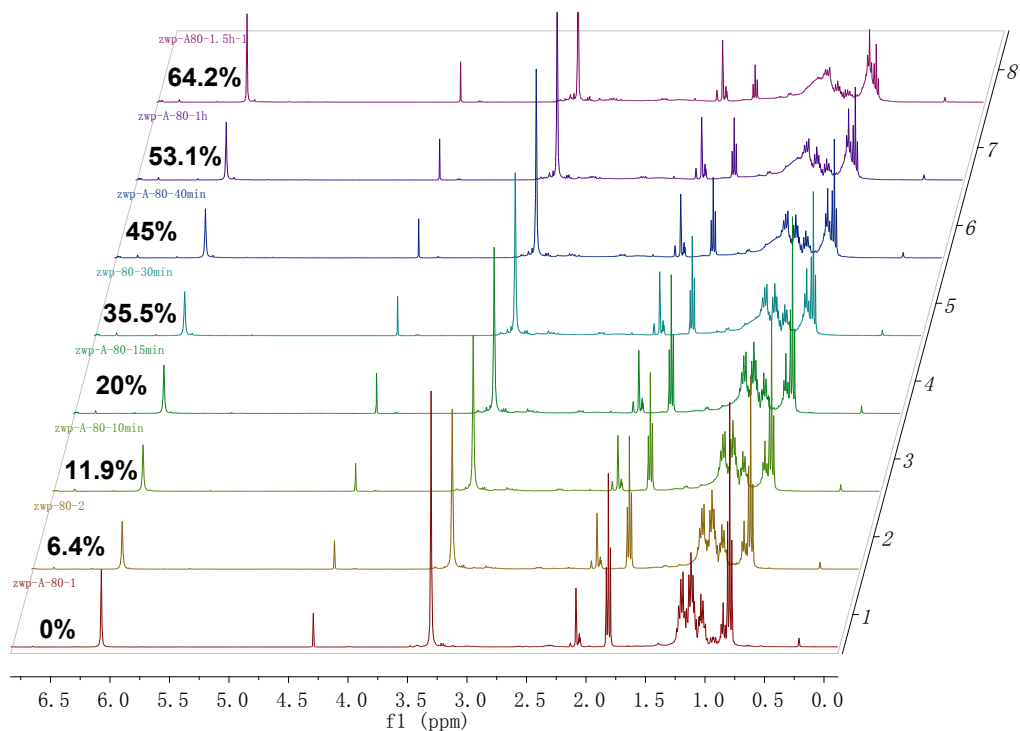

**Figure S12. NMR monitoring experiments of 1-chloro-1-octyne homopolymerization using Pd<sup>i</sup>Pr.**

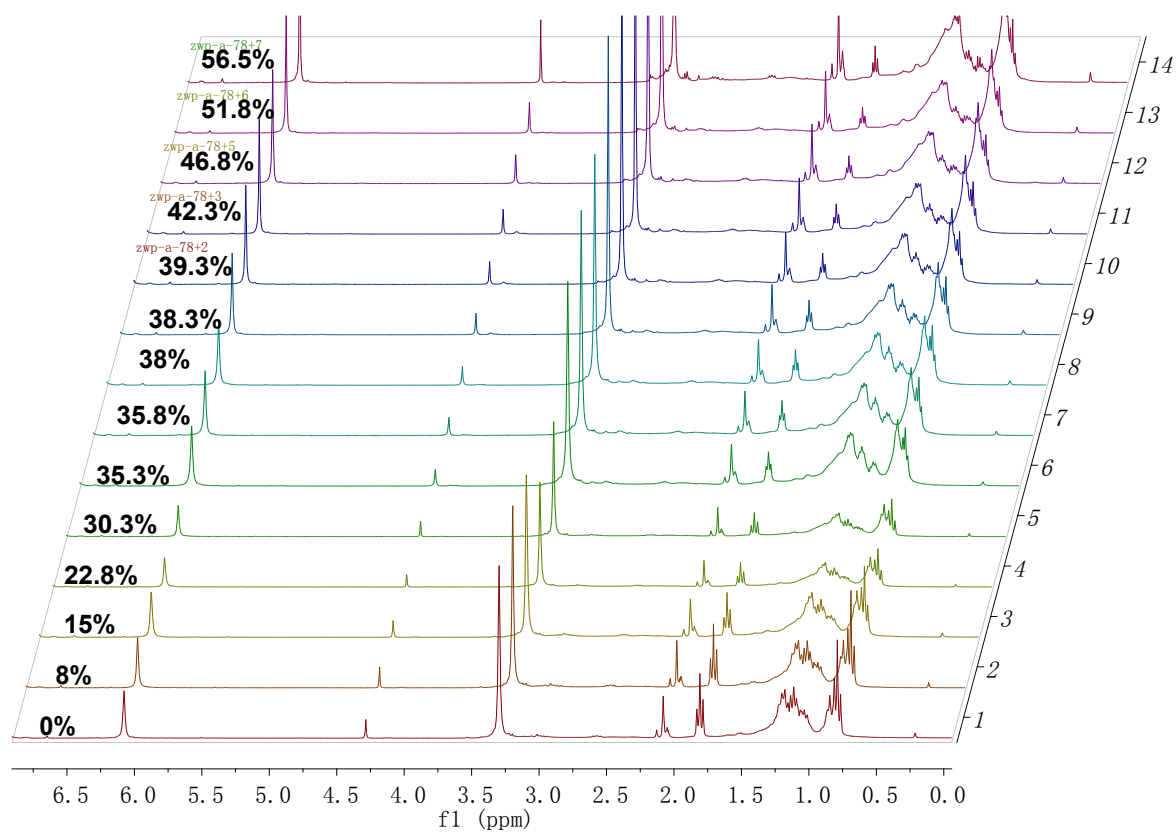

**Figure S13. In-situ switching experiments of 1-chloro-1-octyne homopolymerization using Pd<sup>i</sup>Pr.**

## 7. $^1\text{H}$ and $^{13}\text{C}$ NMR spectra of the polymers

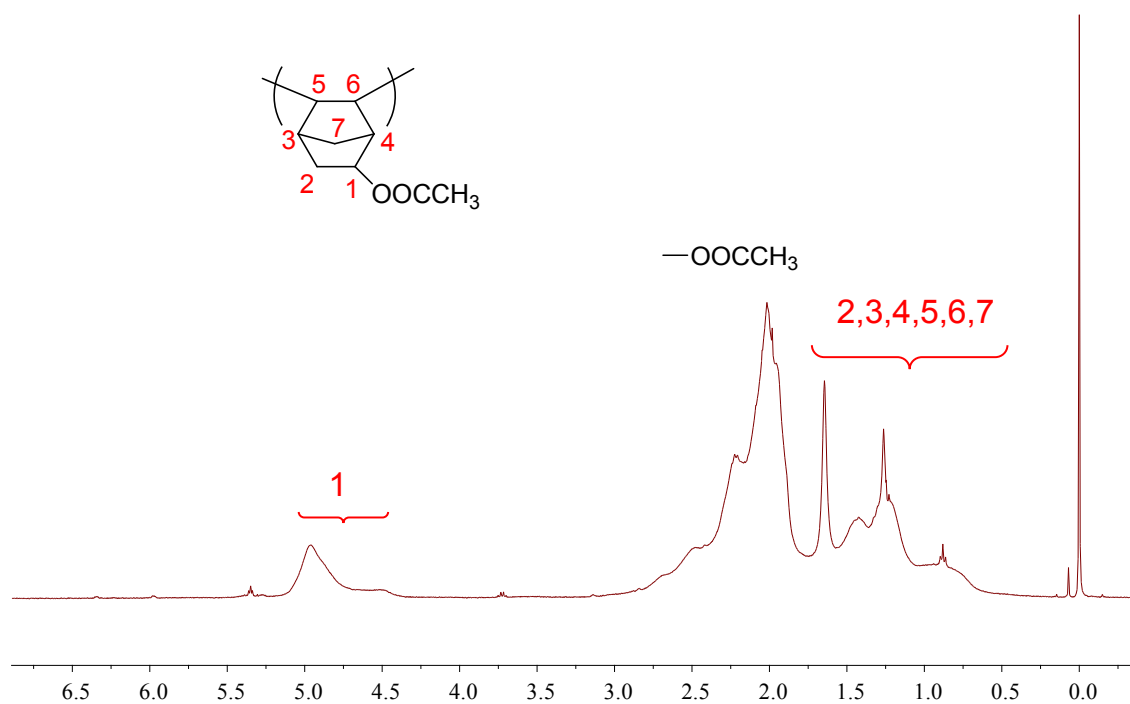

Figure S14.  $^1\text{H}$  NMR spectrum of Poly(NB-OAc) (table 1, entry 5).

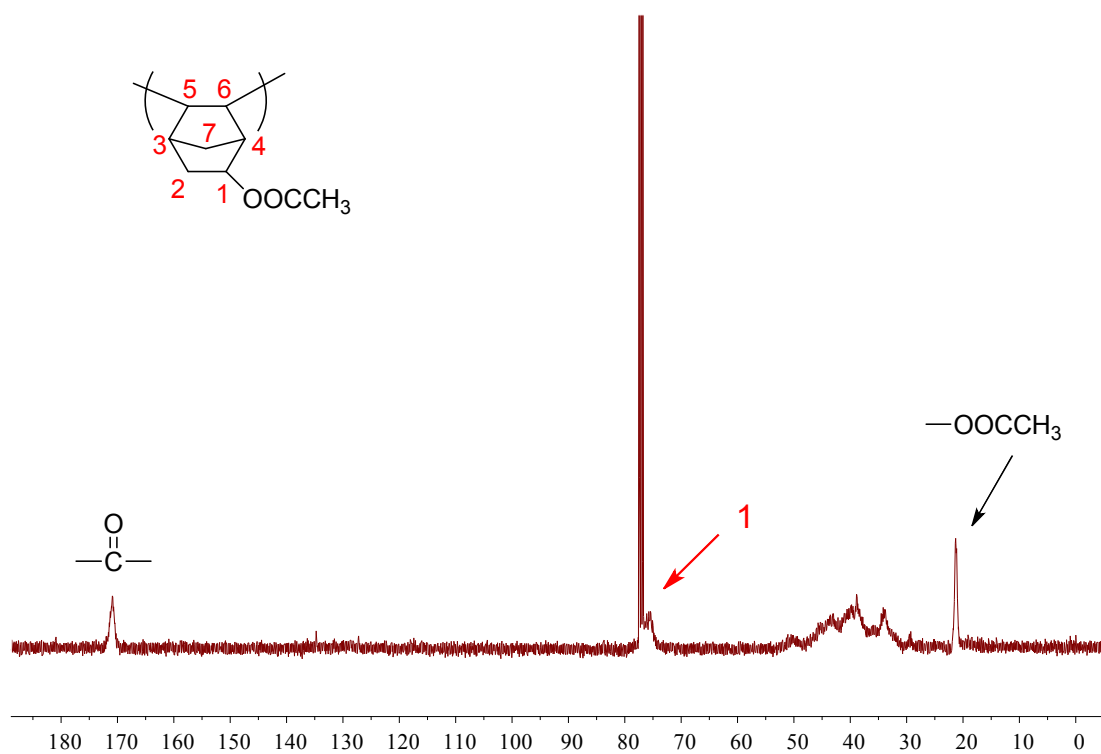

Figure S15.  $^{13}\text{C}$  NMR spectrum of Poly(NB-OAc) (table 1, entry 5).

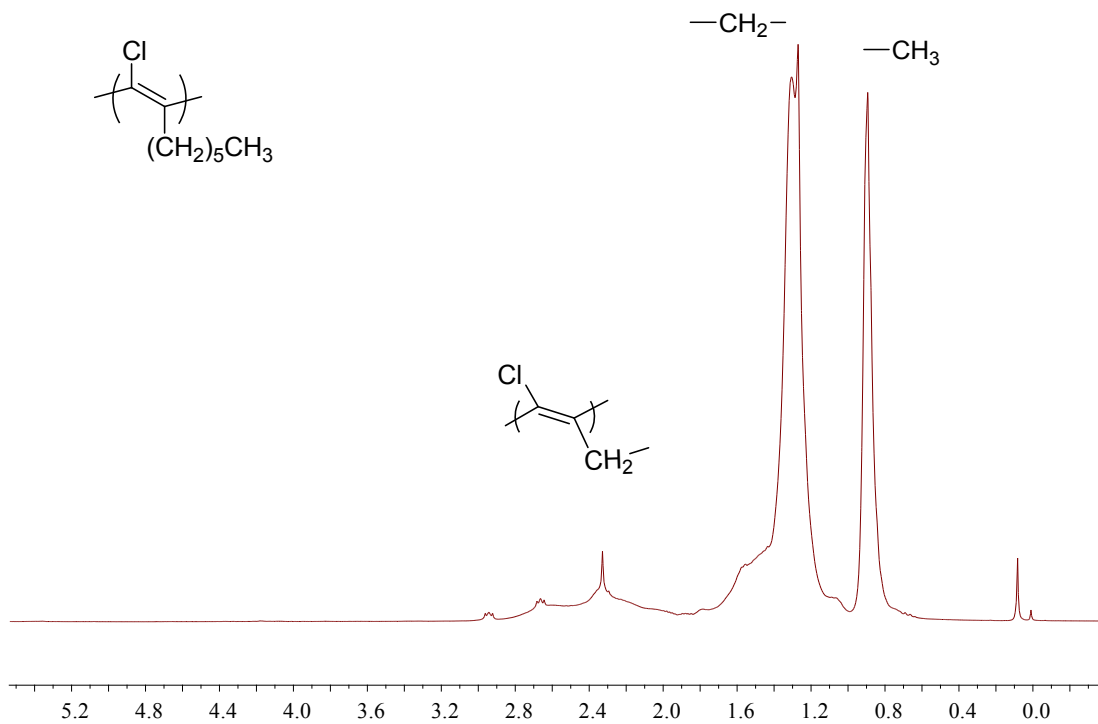

**Figure S16.**  $^1\text{H}$  NMR spectrum of Poly(1-chloro-1-octyne) (table 1, entry 8).

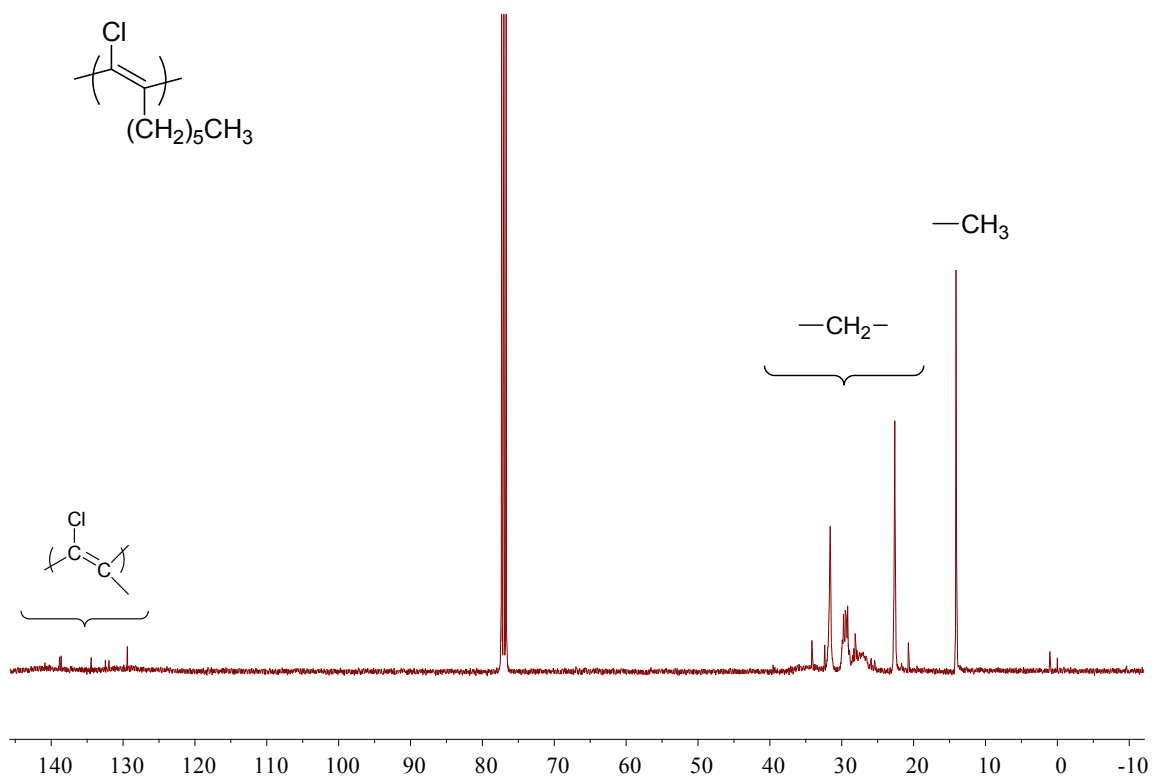

**Figure S17.**  $^{13}\text{C}$  NMR spectrum of Poly(1-chloro-1-octyne) (table 1, entry 8).

## 8. IR spectra of Poly(1-chloro-1-octyne)

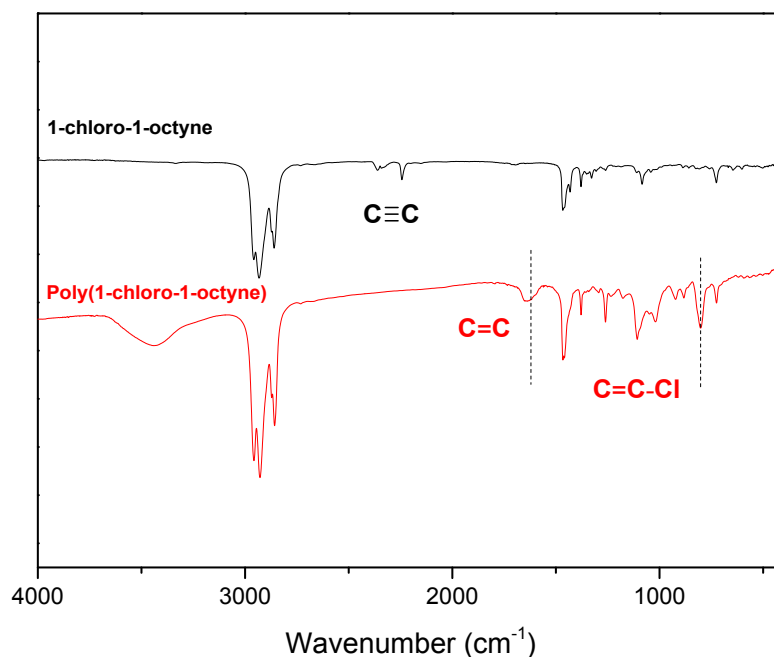

Figure S18. IR spectra of Poly(1-chloro-1-octyne) (table 1, entry 8).

## 9. X-Ray Crystallography of complex Pd-Me.

### Experimental for Pd-Me

Single crystals of  $C_{30}H_{27}ClN_2O_2Pd$  [**zwp-412**] were [yellow]. A suitable crystal was selected and **mounted** on a **Xcalibur, Sapphire3, Gemini ultra** diffractometer. The crystal was kept at 291(2) K during data collection. Using Olex2 [1], the structure was solved with the ShelXS [2] structure solution program using Direct Methods and refined with the ShelXL [3] refinement package using Least Squares minimisation.

### Crystal structure determination of [**zwp-412**]

**Crystal Data** for  $C_{30}H_{27}ClN_2O_2Pd$  ( $M = 589.38$  g/mol): monoclinic, space group C2/c (no. 15),  $a = 38.488(3)$  Å,  $b = 7.7754(6)$  Å,  $c = 17.7580(9)$  Å,  $\beta = 93.993(6)^\circ$ ,  $V = 5301.3(6)$  Å<sup>3</sup>,  $Z = 8$ ,  $T = 292(2)$  K,  $\mu(\text{MoK}\alpha) = 0.831$  mm<sup>-1</sup>,  $D_{\text{calc}} = 1.477$  g/cm<sup>3</sup>, 15250 reflections measured ( $7.006^\circ \leq 2\theta \leq 58.456^\circ$ ), 6088 unique ( $R_{\text{int}} = 0.0414$ ,  $R_{\text{sigma}} = 0.0589$ ) which were used in all calculations. The final  $R_1$  was 0.0492 ( $I > 2\sigma(I)$ ) and  $wR_2$  was 0.1667 (all data).

### Refinement model description

Number of restraints - 13, number of constraints - unknown.

Details:

N/A

This report has been created with Olex2, compiled on 2016.09.09 svn.r3337 for OlexSys.  
Please let us know if there are any errors or if you would like to have additional features.

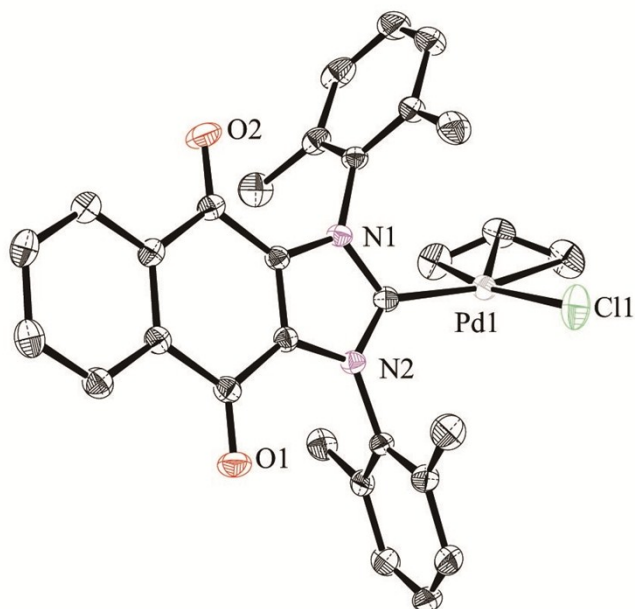

**Figure S19.** Molecular structure of **Pd-Me**.

**Table S2.** Crystal data and structure refinement for **Pd-Me**.

|                                    |                                                                    |
|------------------------------------|--------------------------------------------------------------------|
| Identification code                | zwp-412                                                            |
| Empirical formula                  | C <sub>30</sub> H <sub>27</sub> ClN <sub>2</sub> O <sub>2</sub> Pd |
| Formula weight                     | 589.38                                                             |
| Temperature/K                      | 292 (2)                                                            |
| Crystal system                     | monoclinic                                                         |
| Space group                        | C2/c                                                               |
| a/Å                                | 38.488 (3)                                                         |
| b/Å                                | 7.7754 (6)                                                         |
| c/Å                                | 17.7580 (9)                                                        |
| α /°                               | 90                                                                 |
| β /°                               | 93.993 (6)                                                         |
| γ /°                               | 90                                                                 |
| Volume/Å <sup>3</sup>              | 5301.3 (6)                                                         |
| Z                                  | 8                                                                  |
| ρ <sub>calc</sub> /cm <sup>3</sup> | 1.477                                                              |
| μ /mm <sup>-1</sup>                | 0.831                                                              |
| F(000)                             | 2400.0                                                             |
| Crystal size/mm <sup>3</sup>       | 0.350 × 0.320 × 0.280                                              |

---

|                                               |                                                                      |
|-----------------------------------------------|----------------------------------------------------------------------|
| Radiation                                     | MoK $\alpha$ ( $\lambda = 0.71073$ )                                 |
| 2 $\theta$ range for data collection/°        | 7.006 to 58.456                                                      |
| Index ranges                                  | $-52 \leq h \leq 48$ , $-6 \leq k \leq 10$ ,<br>$-23 \leq l \leq 22$ |
| Reflections collected                         | 15250                                                                |
| Independent reflections                       | 6088 [ $R_{\text{int}} = 0.0414$ , $R_{\text{sigma}} = 0.0589$ ]     |
| Data/restraints/parameters                    | 6088/13/333                                                          |
| Goodness-of-fit on $F^2$                      | 1.080                                                                |
| Final R indexes [ $I \geq 2\sigma(I)$ ]       | $R_1 = 0.0492$ , $wR_2 = 0.1258$                                     |
| Final R indexes [all data]                    | $R_1 = 0.0843$ , $wR_2 = 0.1667$                                     |
| Largest diff. peak/hole / e $\text{\AA}^{-3}$ | 0.72/-0.84                                                           |

---

## References

1. Dolomanov, O.V., Bourhis, L.J., Gildea, R.J., Howard, J.A.K. & Puschmann, H. (2009), *J. Appl. Cryst.* 42, 339-341.
2. G. M. Sheldrick, *SHELXL 97*, Programs for structure refinement, Universität Göttingen, 1997.
3. Sheldrick, G.M. (2008). *Acta Cryst.* A64, 112-122.
